# Supplementary material
Source: PubMed Central journal article supplement (PMC5177461)
Supplement: NIHMS814387-supplement-supplement_1.pdf [file NIHMS814387-supplement-supplement_1.pdf]

**SUPPLEMENTAL TABLES**

| <b>Supplemental Table1 (online only)</b>                                                                                            |                                           |                             |    |
|-------------------------------------------------------------------------------------------------------------------------------------|-------------------------------------------|-----------------------------|----|
| Equivalent Logical Memory scores and CERAD Word List scores<br>based on equipercentile equating<br>( MYHAT crosswalk sample, N=349) |                                           |                             |    |
| Logical Memory Immediate Recall                                                                                                     | CERAD<br>Word List<br>Immediate<br>Recall | 95% Confidence<br>Intervals |    |
| 0                                                                                                                                   | 0                                         | 0                           | 0  |
| 1                                                                                                                                   | 1                                         | 1                           | 3  |
| 2                                                                                                                                   | 2                                         | 2                           | 2  |
| 3                                                                                                                                   | 3                                         | 2                           | 5  |
| 4                                                                                                                                   | 6                                         | 3                           | 8  |
| 5                                                                                                                                   | 8                                         | 6                           | 9  |
| 6                                                                                                                                   | 9                                         | 8                           | 11 |
| 7                                                                                                                                   | 11                                        | 10                          | 13 |
| 8                                                                                                                                   | 13                                        | 12                          | 14 |
| 9                                                                                                                                   | 14                                        | 14                          | 15 |
| 10                                                                                                                                  | 16                                        | 15                          | 17 |
| 11                                                                                                                                  | 17                                        | 16                          | 18 |
| 12                                                                                                                                  | 18                                        | 18                          | 19 |
| 13                                                                                                                                  | 20                                        | 19                          | 20 |
| 14                                                                                                                                  | 21                                        | 20                          | 22 |
| 15                                                                                                                                  | 22                                        | 21                          | 23 |
| 16                                                                                                                                  | 23                                        | 22                          | 24 |
| 17                                                                                                                                  | 24                                        | 23                          | 25 |
| 18                                                                                                                                  | 25                                        | 24                          | 26 |
| 19                                                                                                                                  | 26                                        | 25                          | 27 |
| 20                                                                                                                                  | 27                                        | 26                          | 28 |
| 21                                                                                                                                  | 28                                        | 28                          | 28 |
| 22***                                                                                                                               | 28                                        | 28                          | 28 |
| 23                                                                                                                                  | 28                                        | 28                          | 28 |
| 24                                                                                                                                  | 28                                        | 28                          | 28 |
|                                                                                                                                     |                                           |                             |    |
| Logical Memory Delayed Recall                                                                                                       | CERAD<br>Word List<br>Delayed<br>Recall   | 95% CI                      |    |
| 0                                                                                                                                   | 0                                         | 0                           | 0  |
| 1                                                                                                                                   | 0                                         | 0                           | 0  |
| 2                                                                                                                                   | 0                                         | 0                           | 0  |

## INTERNATIONAL PSYCHOGERIATRICS, in press

|                                                                |       |    |    |
|----------------------------------------------------------------|-------|----|----|
| 3                                                              | 0     | 0  | 1  |
| 4                                                              | 1     | 1  | 1  |
| 5                                                              | 2     | 1  | 2  |
| 6                                                              | 3     | 2  | 3  |
| 7                                                              | 3     | 3  | 4  |
| 8                                                              | 4     | 3  | 5  |
| 9                                                              | 5     | 4  | 5  |
| 10                                                             | 6     | 5  | 6  |
| 11                                                             | 6     | 6  | 7  |
| 12                                                             | 7     | 6  | 7  |
| 13                                                             | 7     | 7  | 8  |
| 14                                                             | 8     | 7  | 8  |
| 15                                                             | 8     | 8  | 9  |
| 16                                                             | 9     | 8  | 9  |
| 17                                                             | 9     | 9  | 10 |
| 18                                                             | 10    | 10 | 10 |
| 19***                                                          | 10*** | 10 | 10 |
| 20                                                             | 10    | 10 | 10 |
| 21                                                             | 10    | 10 | 10 |
| 22                                                             | 10    | 10 | 10 |
| 23                                                             | 10    | 10 | 10 |
| 24                                                             | 10    | 10 | 10 |
| 25                                                             | 10    | 10 | 10 |
| *** these values and up were not observed in the equating data |       |    |    |

| Supplemental Table 2: Attrition over the course of followup. (online only) |                                |                          |                                  |                |                              |
|----------------------------------------------------------------------------|--------------------------------|--------------------------|----------------------------------|----------------|------------------------------|
| Assessment Cycle/Wave                                                      | total sample size at each wave | Number lost due to death | Number lost due to other reasons | Mortality rate | Non-mortality attrition rate |
| 1                                                                          | 3613                           | 192                      | 235                              | 5.3%           | 6.5%                         |
| 2                                                                          | 3186                           | 221                      | 166                              | 6.9%           | 5.2%                         |
| 3                                                                          | 2799                           | 226                      | 139                              | 8.1%           | 5.0%                         |
| 4                                                                          | 2434                           | 216                      | 113                              | 8.9%           | 4.6%                         |
| 5                                                                          | 2105                           | 223                      | 97                               | 10.6%          | 4.6%                         |
| 6                                                                          | 1785                           | 176                      | 90                               | 9.9%           | 5.0%                         |
| 7                                                                          | 1519                           | 49                       | 61                               | 3.2%           | 4.0%                         |
